# Supplementary material for: High frequency direct shoot regeneration from Kazakh commercial potato cultivars
Source: PeerJ. 2020 Jul 13;8:e9447. doi: 10.7717/peerj.9447 (PMC7365135; doi:10.7717/peerj.9447)
Supplement: Supplemental Information 1 [file peerj-08-9447-s001.xlsx]

## Sheet: Лист1
Table 3. Regeneration frequency (%) of potato cultivars of Kazakhstan breeding	Astanalyk internode	DRM-I			DRM-II			DRM-III			DRM-IV			DRM-V			DRM-VI			DRM-VII			DRM-VIII
		Repeat 1	Repeat 2	Repeat 3	Repeat 1	Repeat 2	Repeat 3	Repeat 1	Repeat 2	Repeat 3	Repeat 1	Repeat 2	Repeat 3	Repeat 1	Repeat 2	Repeat 3	Repeat 1	Repeat 2	Repeat 3	Repeat 1	Repeat 2	Repeat 3	Repeat 1	Repeat 2	Repeat 3
	1	1	1	1	1	1	1	1	1	1	1	1	1	1	1	1	1	1	1	1	1	1	1	1	1
	2	1	1	1	1	1	1	1	1	1	0	0	0	0	0	1	1	1	1	1	1	1	1	1	1
	3	1	0	0	1	1	1	1	1	1	0	0	0	0	0	0	1	0	0	1	1	1	1	1	1
	4	0	0	0	1	1	1	1	0	1	0	0	0	0	0	0	1	0	0	1	1	1	1	1	1
	5	0	0	0	1	0	0	0	0	0	0	0	0	0	0	0	0	0	0	0	1	0	1	1	1
	6	0	0	0	1	0	0	0	0	0	0	0	0	0	0	0	0	0	0	0	1	0	1	1	1
	7	0	0	0	0	0	0	0	0	0	0	0	0	0	0	0	0	0	0	0	0	0	1	1	1
	8	0	0	0	0	0	0	0	0	0	0	0	0	0	0	0	0	0	0	0	0	0	1	1	1
	9	0	0	0	0	0	0	0	0	0	0	0	0	0	0	0	0	0	0	0	0	0	1	1	1
	10	0	0	0	0	0	0	0	0	0	0	0	0	0	0	0	0	0	0	0	0		0	0	0
	11	0	0	0	0	0	0	0	0	0	0	0	0	0	0	0	0	0		0	0
	12	0	0	0	0	0	0	0	0	0	0	0	0	0	0	0	0			0	0
	13	0	0	0	0	0	0	0		0	0	0	0	0	0	0				0	0
	14	0		0	0	0	0	0		0	0	0	0	0	0	0				0
	15	0			0	0	0	0		0	0	0	0	0	0	0				0
	16	0			0			0		0	0	0	0	0	0	0
	17	0			0			0		0	0	0	0	0	0	0
	18	0			0			0		0	0	0	0	0	0	0
	19	0			0			0		0	0	0	0	0	0	0
	20	0			0			0		0	0	0	0	0	0	0
	21				0			0			0	0	0	0	0	0
	22				0						0	0	0	0	0	0
	23				0						0	0	0	0	0	0
	24				0						0	0	0	0	0	0
	25										0	0	0	0	0	0
	26										0	0	0	0	0	0
	27										0	0	0	0	0	0
	28											0	0	0	0
	29											0	0	0	0
	30											0	0	0	0
	31											0	0	0	0
	32											0	0	0
	33											0	0	0
	34											0
		0.15	0.153846	0.142857	0.166667	0.333333	0.307692	0.190476	0.25	0.2	0.037037	0.0294118	0.030303	0.030303	0.0322581	0.0689655	0.333333	0.181818	0.2	0.4	0.461538	0.444444	0.9	0.9	0.9
	total	0.148901			0.269231			0.213492			0.0322506			0.0438422			0.238384			0.435328			0.9
	SD	0.0819178	0.104154	0.0970523	0.0902894	0.118187	0.118187	0.0878052	0.130558	0.0917663	0.037037	0.0294118	0.030303	0.030303	0.0322581	0.0513611	0.142134	0.121967	0.133333	0.118187	0.14391	0.175682	0.1	0.1	0.1
		0.0943748			0.108888			0.103377			0.0322506			0.0379741			0.132478			0.145926			0.1
	Astanalyk leaf	DRM-I			DRM-II			DRM-III			DRM-IV			DRM-V			DRM-VI			DRM-VII			DRM-VIII
		Repeat 1	Repeat 2	Repeat 3	Repeat 1	Repeat 2	Repeat 3	Repeat 1	Repeat 2	Repeat 3	Repeat 1	Repeat 2	Repeat 3	Repeat 1	Repeat 2	Repeat 3	Repeat 1	Repeat 2	Repeat 3	Repeat 1	Repeat 2	Repeat 3	Repeat 1	Repeat 2	Repeat 3
	1	1	1	1	1	1	1	1	1	1	1	1	1	1	1	1	1	1	1	1	1	1	1	1	1
	2	0	1	0	1	0	1	1	1	1	0	0	0	0	0	1	1	1	1	1	0	0	1	1	1
	3	0	0	0	0	0	0	1	0	1	0	0	0	0	0	0	1	1	1	0	0	0	1	1	1
	4	0	0	0	0	0	0	0	0	0	0	0	0	0	0	0	1	1	1	0	0	0	1	0	1
	5	0	0	0	0	0	0	0	0	0	0	0	0	0	0	0	0	1	1	0	0	0	1	0	0
	6	0	0	0	0	0	0	0	0	0	0	0	0	0	0	0	0	1	1	0	0	0	0	0	0
	7	0	0	0	0	0	0	0	0	0	0	0	0	0	0	0	0	0		0	0	0	0	0	0
	8	0	0	0	0	0	0	0	0	0	0	0	0	0	0	0	0	0		0	0	0	0	0	0
	9	0	0	0	0	0	0	0	0	0	0	0	0	0	0	0	0	0		0	0	0	0	0	0
	10	0	0	0	0	0	0	0	0	0	0	0	0	0	0	0	0	0		0	0	0	0	0	0
	11	0	0	0	0	0	0	0	0	0	0	0	0	0	0	0	0	0		0	0	0	0	0	0
	12	0	0	0	0	0	0	0	0	0	0	0	0	0	0	0	0	0		0	0	0	0	0	0
	13	0	0	0	0	0	0	0	0	0	0	0	0	0	0	0	0	0		0	0	0	0	0	0
	14	0	0	0	0	0	0	0	0	0	0	0	0	0	0	0	0	0		0	0	0	0	0	0
	15	0	0	0	0	0	0	0	0	0	0	0	0	0	0	0	0	0		0	0		0	0	0
	16	0	0	0	0	0	0	0	0	0	0	0	0	0	0	0	0	0		0	0		0	0	0
	17	0	0	0	0	0	0	0	0	0	0	0	0	0	0	0	0	0		0			0	0	0
	18	0	0	0	0	0	0	0	0	0	0	0	0	0	0	0	0	0		0			0		0
	19	0	0	0	0	0	0	0	0	0	0	0	0	0	0	0	0	0		0			0		0
	20	0	0	0	0	0	0	0	0	0	0	0	0	0	0	0	0	0		0			0		0
	21	0	0	0	0	0	0	0	0		0	0	0	0	0	0	0	0		0			0		0
	22	0	0	0	0	0	0	0	0		0	0	0	0	0	0		0		0			0		0
	23	0	0	0	0	0	0	0	0		0	0	0	0	0	0		0		0			0		0
	24	0	0	0	0	0	0	0	0		0	0	0	0	0	0		0		0					0
	25	0	0	0	0	0	0	0	0		0	0	0	0	0	0		0		0					0
	26	0	0	0	0	0	0	0	0		0	0	0	0	0	0		0
	27	0	0	0	0	0	0	0	0		0	0	0	0	0	0		0
	28	0	0	0	0	0	0	0	0			0	0	0	0			0
	29	0	0	0	0	0	0	0	0			0	0	0	0			0
	30	0	0	0	0	0	0	0	0			0	0	0	0
	31	0	0	0	0	0	0	0	0			0	0	0	0
	32	0	0	0	0	0		0	0			0	0	0
	33	0	0	0	0	0		0	0			0	0	0
	34		0	0	0			0	0			0
	35								0
		0.05	0.0606061	0.0555556	0.0588235	0.030303	0.0645161	0.0588235	0.0571429	0.0571429	0	0	0	0	0	0	0	0	0	0.08	0.0625	0.0714286	0.217391	0.176471	0.16
	total	0.0553872			0.0512142			0.0577031			0			0			0			0.0713095			0.184621
	sd	0.030303	0.0409594	0.0294118	0.0409594	0.030303	0.044853	0.0493748	0.0409594	0.0819178	0	0	0	0	0	0	0	0	0	0.0553775	0.0625	0.0714286	0.0879391	0.095305	0.0748331
		0.0335581			0.0387052			0.0574174												0.063102			0.0860258

## Sheet: Лист2
Table 3. Regeneration frequency (%) of potato cultivars of Kazakhstan breeding	Aksor internode	DRM-I			DRM-II			DRM-III			DRM-IV			DRM-V			DRM-VI			DRM-VII			DRM-VIII
		Repeat 1	Repeat 2	Repeat 3	Repeat 1	Repeat 2	Repeat 3	Repeat 1	Repeat 2	Repeat 3	Repeat 1	Repeat 2	Repeat 3	Repeat 1	Repeat 2	Repeat 3	Repeat 1	Repeat 2	Repeat 3	Repeat 1	Repeat 2	Repeat 3	Repeat 1	Repeat 2	Repeat 3
	1	1	1	1	1	1	1	1	1	1	1	1	1	1	1	1	1	1	1	1	1	1	1	1	1
	2	1	1	1	1	1	1	1	1	1	0	0	1	1	1	1	1	1	1	1	1	1	1	1	1
	3	1	1	1	1	1	1	1	1	1	0	0	0	1	1	1	0	1	1	1	1	1	1	1	1
	4	1	0	0	0	0	1	1	1	1	0	0	0	0	0	1	0	0	0	1	1	1	1	1	1
	5	1	0	0	0	0	1	0	1	0	0	0	0	0	0	0	0	0	0	1	1	0	1	1	1
	6	0	0	0	0	0	1	0	1	0	0	0	0	0	0	0	0	0	0	0	0	0	1	1	1
	7	0	0	0	0	0	0	0	0	0	0	0	0	0	0	0	0	0	0	0	0	0	1	1	1
	8	0	0	0	0	0	0	0	0	0	0	0	0	0	0	0	0	0	0	0	0	0	1	1	1
	9				0	0	0	0	0	0	0	0	0	0	0	0	0	0	0	0	0	0	1	1	1
	10						0	0	0	0	0	0	0	0	0	0	0	0	0		0	0	0	0	1
	11						0	0	0		0	0	0	0	0	0	0	0	0		0		0		0
	12							0	0				0	0	0	0	0	0	0
	13							0	0				0	0	0	0	0	0	0
	14							0	0				0	0	0	0	0	0	0
	15							0	0				0	0	0	0	0	0	0
	16												0	0	0	0		0	0
	17												0	0	0	0		0	0
	18												0		0	0		0	0
	19												0			0		0	0
	20												0			0		0	0
	21												0			0		0	0
	22															0			0
	23															0			0
	24															0
	25															0
	26															0
	27
	28
	29
	30
	31
	32
	33
	34
		0.625	0.375	0.375	0.333333	0.333333	0.461538	0.266667	0.266667	0.2	0.0909091	0.0909091	0.0952381	0.176471	0.166667	0.153846	0.133333	0.142857	0.130435	0.555556	0.454545	0.4	0.818182	0.9	0.909091
		0.458333			0.376068			0.244444			0.0923521			0.165661			0.135542			0.470034			0.875758
	SD	0.182981	0.182981	0.182981	0.166667	0.166667	0.157459	0.118187	0.130931	0.163299	0.0909091	0.0909091	0.0656383	0.095305	0.0903877	0.0721602	0.0908514	0.0782461	0.071802	0.175682	0.157459	0.163299	0.121967	0.1	0.0909091
		0.182981			0.163597			0.137472			0.0824855			0.085951			0.0802998			0.16548			0.104292
	Aksor leaf	DRM-I			DRM-II			DRM-III			DRM-IV			DRM-V			DRM-VI			DRM-VII			DRM-VIII
		Repeat 1	Repeat 2	Repeat 3	Repeat 1	Repeat 2	Repeat 3	Repeat 1	Repeat 2	Repeat 3	Repeat 1	Repeat 2	Repeat 3	Repeat 1	Repeat 2	Repeat 3	Repeat 1	Repeat 2	Repeat 3	Repeat 1	Repeat 2	Repeat 3	Repeat 1	Repeat 2	Repeat 3
	1	1	1	1	1	1	1	1	1	1	0	0	0	0	0	0	0	0	0	1	1	1	1	1	1
	2	1	1	1	1	1	1	1	1	1	0	0	0	0	0	0	0	0	0	1	1	1	1	1	1
	3	1	1	1	1	1	1	1	1	1	0	0	0	0	0	0	0	0	0	1	1	1	1	1	1
	4	1	1	0	0	1	1	0	0	0	0	0	0	0	0	0	0	0	0	1	0	1	1	1	1
	5	0	1	0	0	1	0	0	0	0	0	0	0	0	0	0	0	0	0	1	0	0	1	1	1
	6	0	0	0	0	0	0	0	0	0	0	0	0	0	0	0	0	0	0	1	0	0	1	1	1
	7	0	0	0	0	0	0	0	0	0	0	0	0	0	0	0	0	0	0	0	0	0	1	1	1
	8	0	0	0	0	0	0	0	0	0	0	0	0	0	0	0	0	0	0	0	0	0	0	0	1
	9	0	0	0	0	0	0	0	0	0	0	0	0	0	0	0	0	0	0	0	0	0	0	0	0
	10	0	0	0	0	0	0	0	0	0	0	0	0	0	0	0	0	0	0	0	0	0	0	0	0
	11	0	0		0	0	0	0	0	0	0	0	0	0	0	0	0	0	0	0			0
	12	0	0		0	0	0	0	0	0	0	0	0	0	0	0	0	0	0	0			0
	13		0		0	0		0	0	0	0	0	0	0	0	0	0	0	0	0			0
	14					0		0	0	0	0	0	0	0	0	0	0	0		0
	15					0		0	0	0	0	0	0	0	0	0	0	0
	16					0		0	0	0	0	0	0	0	0	0	0	0
	17							0	0	0	0	0	0	0	0	0	0	0
	18							0		0	0	0	0	0	0	0	0	0
	19							0			0	0	0	0	0	0	0	0
	20																0	0
	21																0	0
	22																	0
	23																	0
	24																	0
	25																	0
	26
	27
	28
	29
	30
	31
	32
	33
	34											0
		0.333333	0.384615	0.3	0.230769	0.3125	0.333333	0.157895	0.176471	0.166667	0	0	0	0	0	0	0	0	0	0.428571	0.3	0.4	0.538462	0.7	0.8
		0.339316			0.292201			0.167011			0			0			0			0.37619			0.679487
	SD	0.142134	0.140442	0.152753	0.121626	0.119678	0.142134	0.085947	0.095305	0.0903877	0			0			0			0.137253	0.152753	0.163299	0.14391	0.152753	0.133333
		0.145109			0.127813			0.0905466												0.151102			0.143332

## Sheet: Лист3
Table 3. Regeneration frequency (%) of potato cultivars of Kazakhstan breeding	Tokhtar internode	DRM-I			DRM-II			DRM-III			DRM-IV			DRM-V			DRM-VI			DRM-VII			DRM-VIII
		Repeat 1	Repeat 2	Repeat 3	Repeat 1	Repeat 2	Repeat 3	Repeat 1	Repeat 2	Repeat 3	Repeat 1	Repeat 2	Repeat 3	Repeat 1	Repeat 2	Repeat 3	Repeat 1	Repeat 2	Repeat 3	Repeat 1	Repeat 2	Repeat 3	Repeat 1	Repeat 2	Repeat 3
	1	1	1	1	1	1	1	1	1	1	1	1	1	1	1	1	1	1	1	1	1	1	1	1	1
	2	1	1	1	1	1	1	1	1	1	0	0	0	1	1	1	1	1	1	1	1	1	1	1	1
	3	1	0	1	1	1	1	0	1	0	0	0	0	0	0	0	1	0	0	1	1	1	1	1	1
	4	1	0	1	1	1	1	0	1	0	0	0	0	0	0	0	0	0	0	1	1	1	1	1	1
	5	1	0	0	1	0	1	0	0	0	0	0	0	0	0	0	0	0	0	0	1	1	1	1	1
	6	0	0	0	1	0	0	0	0	0	0	0	0	0	0	0	0	0	0	0	1	0	1	1	1
	7	0	0	0	0	0	0	0	0	0	0	0	0	0	0	0	0	0	0	0	0	0	1	1	1
	8	0	0	0	0	0	0	0	0	0	0	0	0	0	0	0	0			0	0	0	0	0	0
	9	0	0	0	0	0	0	0	0	0	0	0	0	0	0	0	0			0	0	0	0	0	0
	10	0	0	0	0	0	0	0	0	0	0	0	0	0	0	0				0	0	0	0	0	0
	11	0	0	0	0	0	0	0	0	0	0	0	0	0	0	0					0	0
	12	0	0	0	0	0	0	0	0	0	0	0	0	0	0	0					0	0
	13	0	0	0	0	0	0	0	0		0	0	0	0	0	0					0	0
	14	0		0	0	0	0	0	0		0	0	0	0	0	0					0
	15	0		0	0	0	0		0		0	0	0	0	0	0					0
	16	0		0	0	0			0		0	0	0	0	0	0					0
	17	0		0	0	0			0		0	0	0	0	0	0
	18	0		0	0	0			0		0	0	0	0	0	0
	19	0		0	0						0	0	0	0	0	0
	20	0		0	0						0	0	0	0	0
	21	0		0	0						0	0	0	0
	22			0	0						0	0	0
	23			0	0						0	0	0
	24			0	0						0	0	0
	25			0							0	0	0
	26										0	0	0
	27										0
	28										0
	29										0
	30
	31
	32
	33
	34
		0.238095	0.153846	0.16	0.25	0.222222	0.333333	0.142857	0.222222	0.166667	0.0344828	0.0384615	0.0384615	0.0952381	0.1	0.105263	0.285714	0.285714	0.333333	0.363636	0.375	0.384615	0.7	0.7	0.7
		0.18398			0.268519			0.177249			0.0371353			0.100167			0.301587			0.374417			0.7
	SD	0.0952381	0.104154	0.0748331	0.0902894	0.100832	0.125988	0.0970523	0.100832	0.112367	0.0344828	0.0384615	0.0384615	0.0656383	0.0688247	0.0723352	0.166667	0.184428	0.184428	0.163299	0.125	0.140442	0.152753	0.152753	0.152753
		0.0914085			0.105703			0.103417			0.0371353			0.0689327			0.178507			0.142914			0.152753
	Tokhtar leaf	DRM-I			DRM-II			DRM-III			DRM-IV			DRM-V			DRM-VI			DRM-VII			DRM-VIII
		Repeat 1	Repeat 2	Repeat 3	Repeat 1	Repeat 2	Repeat 3	Repeat 1	Repeat 2	Repeat 3	Repeat 1	Repeat 2	Repeat 3	Repeat 1	Repeat 2	Repeat 3	Repeat 1	Repeat 2	Repeat 3	Repeat 1	Repeat 2	Repeat 3	Repeat 1	Repeat 2	Repeat 3
	1	1	1	1	1	1	1	1	1	1	0	0	0	0	0	0	1	1	1	1	1	1	1	1	1
	2	1	1	0	1	1	1	1	1	1	0	0	0	0	0	0	1	0	0	1	0	0	1	1	1
	3	1	0	0	1	1	1	0	0	0	0	0	0	0	0	0	0	0	0	0	0	0	1	1	1
	4	0	0	0	0	1	0	0	0	0	0	0	0	0	0	0	0	0	0	0	0	0	1	1	1
	5	0	0	0	0	0	0	0	0	0	0	0	0	0	0	0	0	0	0	0	0	0	1	0	0
	6	0	0	0	0	0	0	0	0	0	0	0	0	0	0	0	0	0	0	0	0	0	0	0	0
	7	0	0	0	0	0	0	0	0	0	0	0	0	0	0	0	0	0		0	0	0	0	0	0
	8	0	0	0	0	0	0	0	0	0	0	0	0	0	0	0	0	0		0	0	0	0	0	0
	9	0	0	0	0	0	0	0	0	0	0	0	0	0	0	0	0	0		0	0	0	0	0	0
	10	0	0	0	0	0	0	0	0	0	0	0	0	0	0	0	0	0		0	0	0	0	0	0
	11	0	0	0	0	0	0	0	0	0	0	0	0	0	0	0	0	0		0	0	0	0	0	0
	12	0	0	0	0	0	0	0	0	0	0	0	0	0	0	0	0	0		0	0	0	0	0	0
	13	0	0	0	0	0	0	0	0	0	0	0	0	0	0	0	0	0		0	0	0	0	0
	14	0	0	0	0	0	0	0	0	0	0	0	0	0	0	0	0	0		0	0	0	0
	15	0	0	0	0	0	0	0	0	0	0	0	0	0	0	0	0	0		0	0	0	0
	16	0	0	0	0	0	0	0	0	0	0	0	0	0	0	0	0	0		0	0	0	0
	17	0	0	0	0	0	0	0	0	0	0	0	0	0	0	0	0	0		0		0	0
	18	0	0	0	0	0	0	0	0	0	0	0	0	0	0	0	0	0		0		0	0
	19	0	0	0	0	0	0	0	0	0	0	0	0	0	0	0	0	0		0			0
	20	0	0		0	0	0	0	0	0	0	0	0	0	0	0	0	0		0			0
	21	0	0		0	0	0	0	0	0	0	0	0	0	0	0	0	0		0
	22	0	0		0	0	0	0	0	0	0	0	0	0	0	0	0	0		0
	23	0	0		0	0	0	0	0	0	0	0	0	0	0	0	0	0		0
	24	0	0		0	0	0	0	0	0	0	0	0	0	0	0	0	0		0
	25	0			0	0	0	0	0	0	0	0	0	0	0	0	0	0		0
	26	0			0	0	0	0	0	0	0	0	0	0	0	0	0	0		0
	27	0			0	0	0	0	0	0	0	0	0	0	0	0	0	0		0
	28	0			0	0		0	0	0		0	0	0	0		0			0
	29	0			0	0		0	0	0		0	0	0	0		0			0
	30	0						0	0	0		0	0	0	0		0
	31	0						0	0	0		0	0	0	0		0
	32							0	0	0		0	0	0			0
	33							0	0	0		0	0	0			0
	34							0	0	0		0					0
		0.0967742	0.0833333	0.0526316	0.103448	0.137931	0.111111	0.0588235	0.0588235	0.0588235	0	0	0	0	0	0	0.0588235	0.037037	0.0555556	0.0689655	0.0625	0.0555556	0.25	0.307692	0.333333
		0.0775797			0.117497			0.0588235			0			0			0.050472			0.0623404			0.297009
	SD	0.0539781	0.0576303	0.0526316	0.0575533	0.0651663	0.0616334	0.0409594	0.0409594	0.0409594	0	0	0	0	0	0	0.0409594	0.037037	0.166667	0.0478872	0.0625	0.0555556	0.0993399	0.133235	0.142134
		0.0547467			0.061451			0.0409594									0.0815544			0.0553143			0.124903

## Sheet: Лист4
Table 3. Regeneration frequency (%) of potato cultivars of Kazakhstan breeding	Kunayev Monument internode	DRM-I			DRM-II			DRM-III			DRM-IV			DRM-V			DRM-VI			DRM-VII			DRM-VIII
		Repeat 1	Repeat 2	Repeat 3	Repeat 1	Repeat 2	Repeat 3	Repeat 1	Repeat 2	Repeat 3	Repeat 1	Repeat 2	Repeat 3	Repeat 1	Repeat 2	Repeat 3	Repeat 1	Repeat 2	Repeat 3	Repeat 1	Repeat 2	Repeat 3	Repeat 1	Repeat 2	Repeat 3
	1	1	1	1	1	1	1	0	0	0	0	0	0	0	0	0	1	0	1	1	1	1	1	1	1
	2	0	0	0	0	0	1	0	0	0	0	0	0	0	0	0	0	0	0	1	1	1	1	1	1
	3	0	0	0	0	0	0	0	0	0	0	0	0	0	0	0	0	0	0	0	0	0	1	1	1
	4	0	0	0	0	0	0	0	0	0	0	0	0	0	0	0	0	0	0	0	0	0	0	0	0
	5	0	0	0	0	0	0	0	0	0	0	0	0	0	0	0	0	0	0	0	0	0	0	0	0
	6	0	0	0	0	0	0	0	0	0	0	0	0	0	0	0	0	0	0	0	0	0	0	0	0
	7	0	0	0	0	0	0	0	0	0	0	0	0	0	0	0	0	0	0	0	0	0	0	0	0
	8	0	0	0	0	0	0	0	0	0	0	0	0	0	0	0	0	0	0	0	0	0	0	0	0
	9	0	0	0	0	0	0	0	0	0	0	0	0	0	0	0	0	0	0	0	0	0	0	0	0
	10	0	0	0	0	0	0	0	0	0	0	0	0	0	0	0	0	0	0	0	0	0	0	0
	11	0	0	0	0			0	0		0	0		0	0		0	0		0
	12	0	0	0	0			0	0		0			0	0		0	0		0
	13	0	0	0	0			0			0			0	0		0	0		0
	14	0	0	0	0			0			0			0			0	0		0
	15	0	0	0	0			0			0			0			0	0		0
	16	0	0	0				0						0			0			0
	17	0	0	0				0						0			0			0
	18	0	0					0						0			0			0
	19	0						0									0			0
	20	0						0									0			0
		0.05	0.0555556	0.0588235	0.0833333	0.111111	0.2	0	0	0	0	0	0	0	0	0	0.05	0	0.1	0.1	0.133333	0.2	0.3	0.3	0.333333
total		0.054793			0.131481			0			0			0			0.05			0.144444			0.311111
SD		0.05	0.0555556	0.0588235	0.0666667	0.1	0.133333										0.05	0	0.1	0.0688247	0.133333	0.133333	0.152753	0.152753	0.166667
		0.054793			0.1												0.05			0.11183			0.157391
	Kunayev Monument leaf	DRM-I			DRM-II			DRM-III			DRM-IV			DRM-V			DRM-VI			DRM-VII			DRM-VIII
		Repeat 1	Repeat 2	Repeat 3	Repeat 1	Repeat 2	Repeat 3	Repeat 1	Repeat 2	Repeat 3	Repeat 1	Repeat 2	Repeat 3	Repeat 1	Repeat 2	Repeat 3	Repeat 1	Repeat 2	Repeat 3	Repeat 1	Repeat 2	Repeat 3	Repeat 1	Repeat 2	Repeat 3
	1	0	0	0	1	1	1	0	0	0	0	0	0	0	0	0	0	0	0	1	1	1	1	1	0
	2	0	0	0	1	1	1	0	0	0	0	0	0	0	0	0	0	0	0	0	0	0	0	0	0
	3	0	0	0	0	1	0	0	0	0	0	0	0	0	0	0	0	0	0	0	0	0	0	0	0
	4	0	0	0	0	0	0	0	0	0	0	0	0	0	0	0	0	0	0	0	0	0	0	0	0
	5	0	0	0	0	0	0	0	0	0	0	0	0	0	0	0	0	0	0	0	0	0	0	0	0
	6	0	0	0	0	0	0	0	0	0	0	0	0	0	0	0	0	0	0	0	0	0	0	0	0
	7	0	0	0	0	0	0	0	0	0	0	0	0	0	0	0	0	0	0	0	0	0	0	0	0
	8	0	0	0	0	0	0	0	0	0	0	0	0	0	0	0	0	0	0	0	0	0	0	0	0
	9	0	0	0	0	0	0	0	0	0	0	0	0	0	0	0	0	0	0	0	0	0	0	0	0
	10	0	0	0	0	0	0	0	0	0	0	0	0	0	0	0	0	0	0	0	0	0	0	0	0
	11	0	0		0	0	0	0	0		0	0		0	0		0	0		0	0	0	0	0	0
	12	0	0		0	0	0	0	0		0	0		0	0		0	0		0	0	0	0	0	0
	13	0	0		0	0	0	0	0		0	0		0	0		0	0		0	0	0	0	0	0
	14	0	0		0	0	0	0	0		0	0		0	0		0	0		0	0	0	0	0
	15	0	0		0	0	0	0	0		0	0		0	0		0			0	0	0	0	0
	16	0	0		0	0	0	0			0	0		0			0			0	0	0	0	0
	17	0	0		0	0	0	0			0	0		0			0			0	0	0	0	0
	18	0	0		0	0		0			0	0		0			0			0	0	0	0	0
	19	0			0	0		0			0			0			0			0	0	0	0	0
	20	0			0			0			0						0			0	0	0	0	0
	21	0									0						0			0	0	0	0	0
	22	0									0									0	0	0	0	0
	23	0																		0	0	0	0	0
	24																			0	0		0	0
	25																			0	0		0	0
	26																			0			0
	27																						0
	28																						0
	29																						0
	30
	31
	32
	33
	34
		0	0	0	0.1	0.157895	0.117647	0	0	0	0	0	0	0	0	0	0	0	0	0.0384615	0.04	0.0434783	0.0344828	0.04	0
		0			0.125181			0			0			0			0			0.0406466			0.0248276
	sd	0	0	0	0.0688247	0.085947	0.0805474													0.0384615	0.04	0.0434783	0.0344828	0.04	0
					0.0784397															0.0406466			0.0248276
