# Supplementary material for: High frequency direct shoot regeneration from Kazakh commercial potato cultivars
Source: PeerJ. 2020 Jul 13;8:e9447. doi: 10.7717/peerj.9447 (PMC7365135; doi:10.7717/peerj.9447)
Supplement: Supplemental Information 2 [file peerj-08-9447-s002.xlsx]

## Sheet: Лист1
	Astanalyk	Aksor	Tokhtar	Kunayev Monument
DR I	4.3	6.45	5.8	1
DR II	2.5	5.1	6.26	1
DR III	3.5	6.4	3.5	0
DR IV	4.67	7.5	1	0
DR V	2	7.4	9	0
DR VI	3	5.1	6	1
DR VII	2.2	6.2	5.5	2
DR VIII	6.2	10	9	3

## Sheet: Лист4
Astanalyk	DRM-I	DRM-II	DRM-III	DRM-IV	DRM-V	DRM-VI	DRM-VII	DRM-VIII
	3	2	5	7	2	2	6	8
	4	1	1	1	2	3	4	6
	6	2	6	6	2	3	3	4
	5	3	2			3	3	5
	4	4	3			6	2	8
	3	2	5			3	1	10
	5	2	5			2	1	7
		1	3			2	1	9
		3	5				1	7
		3	2				1	6
		4	1				2	21
							2	2
							1	3
							3	5
								5
								3
								2
								1
								2
								10
								7
								8
								5
								9
								4
								5
								6
	4.28571	2.45455	3.45455	4.66667	2	3	2.21429	6.22222
	0.42056	0.312283	0.545455	1.85592	0	0.46291	0.394726	1.05581

## Sheet: Лист2
Aksor	DRM-I	DRM-II	DRM-III	DRM-IV	DRM-V	DRM-VI	DRM-VII	DRM-VIII
	1	6	8	8	5	4	2	2
	3	2	7	7	7	6	2	11
	2	3	6	7	7	3	13	10
	5	4	4	8	10	7	5	6
	1	3	7		8	7	9	16
	3	4	10		10	6	4	10
	6	6	5		7	5	10	10
	7	6	8		5	3	6	12
	14	4	4		7		2	8
	11	7	5		8		8	3
	18	9					8	7
		8					2	9
							9	13
							7	11
								17
								21
								3
								11
								15
								10
								5
								4
								7
								5
								8
								14
								16
								16
	6.45455	5.16667	6.4	7.5	7.4	5.125	6.21429	10
	1.69686	0.625631	0.618241	0.288675	0.541603	0.580563	0.93866	1.09654

## Sheet: Лист3
Tokhtar	DRM-I	DRM-II	DRM-III	DRM-IV	DRM-V	DRM-VI	DRM-VII	DRM-VIII
	1	2	1	1	10	2	1	9
	5	3	1	1	12	4	7	6
	7	11	3	1	7	6	10	7
	6	2	5		6	3	5	10
	12	12	4		9	9	8	13
	7	6	10		10	13	7	4
	4	3	3			5	5	16
	6	11	1				1	12
	10	3					6	9
	1	2					5	9
	5	5					3	8
		3					9	17
		7					3	11
		13					4	10
		11					9	2
								19
								3
								3
								5
								13
								3
	5.81818	6.26667	3.5	1	9	6	5.53333	9
	0.998346	1.07998	1.06904	0	0.894427	1.44749	0.729427	1.0601

## Sheet: Лист5
Kunayev Monument	DRM-I	DRM-II	DRM-III	DRM-IV	DRM-V	DRM-VI	DRM-VII	DRM-VIII
	1	1	0	0	0	1	2	1
	1	1	0	0	0	1	1	3
	1	1	0	0	0		3	5
		1	0	0	0		2	4
			0	0	0		2	2
			0	0	0		2	3
			0	0	0			3
			0	0	0			3
			0	0	0			3
			0	0	0
			0	0	0
			0	0	0
			0	0	0
			0	0	0
	1	1	0	0	0	1	2	3
	0	0	0	0	0	0	0.258199	0.372678
