# Supplementary material for: High frequency direct shoot regeneration from Kazakh commercial potato cultivars
Source: PeerJ. 2020 Jul 13;8:e9447. doi: 10.7717/peerj.9447 (PMC7365135; doi:10.7717/peerj.9447)
Supplement: Supplemental Information 3 [file peerj-08-9447-s003.xlsx]

## Sheet: Sheet1
Table Analyzed	Two-way ANOVA , not RM
Two-way RM ANOVA	Matching by cols
Source of Variation	% of total variation	P value
Interaction	10.55	< 0.0001
Time	16.22	< 0.0001
Column Factor	12.65	< 0.0001
Subjects (matching)	11.6864	0.0016
Source of Variation	P value summary	Significant?
Interaction	****	Yes
Time	****	Yes
Column Factor	****	Yes
Subjects (matching)	**	Yes
Source of Variation	Df	Sum-of-squares	Mean square	F
Interaction	21	872.6	41.55	4.435
Time	7	1341	191.6	20.45
Column Factor	3	1046	348.7	22.01
Subjects (matching)	61	966.4	15.84	1.691
Residual	427	4001	9.37
Number of missing values	0
Bonferroni multiple comparisons	Number of comparisons: 24
Aksor vs Astanalyk
Column Factor	Aksor	Astanalyk	Difference	95% CI of diff.
DR I	4	3.611	-0.3889	-3.728 to 2.950
DR II	3.647	0.8333	-2.814	-6.153 to 0.5255
DR III	6.059	2.722	-3.337	-6.676 to 0.002634
DR IV	1.765	4.5	2.735	-0.6039 to 6.075
DR V	4.353	1.556	-2.797	-6.137 to 0.5419
DR VI	4.529	2.667	-1.863	-5.202 to 1.476
DR VII	1.824	2.222	0.3987	-2.941 to 3.738
DR VIII	10	5.889	-4.111	-7.450 to -0.7719
Column Factor	Difference	t	P value	Summary
DR I	-0.3889	0.3604	P > 0.05	ns
DR II	-2.814	2.608	P > 0.05	ns
DR III	-3.337	3.092	P > 0.05	ns
DR IV	2.735	2.535	P > 0.05	ns
DR V	-2.797	2.593	P > 0.05	ns
DR VI	-1.863	1.726	P > 0.05	ns
DR VII	0.3987	0.3695	P > 0.05	ns
DR VIII	-4.111	3.81	P < 0.01	**
Aksor vs Tokhtar
Column Factor	Aksor	Tokhtar	Difference	95% CI of diff.
DR I	4	5.438	1.438	-2.002 to 4.877
DR II	3.647	5.875	2.228	-1.211 to 5.667
DR III	6.059	2.625	-3.434	-6.873 to 0.005288
DR IV	1.765	0.1875	-1.577	-5.016 to 1.862
DR V	4.353	3.375	-0.9779	-4.417 to 2.461
DR VI	4.529	2.625	-1.904	-5.344 to 1.535
DR VII	1.824	2.75	0.9265	-2.513 to 4.366
DR VIII	10	10	0	-3.439 to 3.439
Column Factor	Difference	t	P value	Summary
DR I	1.438	1.294	P > 0.05	ns
DR II	2.228	2.005	P > 0.05	ns
DR III	-3.434	3.09	P > 0.05	ns
DR IV	-1.577	1.419	P > 0.05	ns
DR V	-0.9779	0.88	P > 0.05	ns
DR VI	-1.904	1.714	P > 0.05	ns
DR VII	0.9265	0.8337	P > 0.05	ns
DR VIII	0	0	P > 0.05	ns
Aksor vs Kunaev Monument
Column Factor	Aksor	Kunaev Monument	Difference	95% CI of diff.
DR I	4	0.2857	-3.714	-7.278 to -0.1509
DR II	3.647	0.1429	-3.504	-7.068 to 0.05921
DR III	6.059	0	-6.059	-9.622 to -2.495
DR IV	1.765	0	-1.765	-5.328 to 1.799
DR V	4.353	0	-4.353	-7.916 to -0.7895
DR VI	4.529	0.4286	-4.101	-7.664 to -0.5374
DR VII	1.824	2	0.1765	-3.387 to 3.740
DR VIII	10	2.786	-7.214	-10.78 to -3.651
Column Factor	Difference	t	P value	Summary
DR I	-3.714	3.226	P < 0.05	*
DR II	-3.504	3.043	P > 0.05	ns
DR III	-6.059	5.262	P < 0.0001	****
DR IV	-1.765	1.533	P > 0.05	ns
DR V	-4.353	3.78	P < 0.01	**
DR VI	-4.101	3.561	P < 0.01	**
DR VII	0.1765	0.1533	P > 0.05	ns
DR VIII	-7.214	6.265	P < 0.0001	****
