# Supplementary material for: High frequency direct shoot regeneration from Kazakh commercial potato cultivars
Source: PeerJ. 2020 Jul 13;8:e9447. doi: 10.7717/peerj.9447 (PMC7365135; doi:10.7717/peerj.9447)
Supplement: Supplemental Information 4 [file peerj-08-9447-s004.xlsx]

## Sheet: Лист1
	Astanalyk	Aksor	Tokhtar	Kunayev Monument
DR I	2.5	6.2	4	0
DR II	1.6	3.33	2.3	1
DR III	2.75	1.6	3.33	0
DR IV	0	0	0	0
DR V	0	0	0	0
DR VI	0	0	1.5	0
DR VII	2	4.3	4.5	1.6
DR VIII	2.5	8	6	2.5

## Sheet: Лист3
Astanalyk	DRM-I	DRM-II	DRM-III	DRM-IV	DRM-V	DRM-VI	DRM-VII	DRM-VIII
	1	1	2	0	0	0	2	2
	2	1	3	0	0	0	2	1
	5	1	2	0	0	0	2	2
	2	4	3	0	0	0	2	3
		1	1	0	0	0		5
			2	0	0	0		4
			6	0	0	0		2
			3	0	0	0		1
				0	0	0		2
				0	0	0		1
				0	0	0		4
				0	0	0		3
				0	0	0
				0	0	0
				0	0	0
M	2.5	1.6	2.75	0	0	0	2	2.5
m	0.866025	0.6	0.556349	0	0	0	0	0.379393
t	0.407084		0.348446				0.469537	0.469537

## Sheet: Лист2
Aksor	DRM-I	DRM-II	DRM-III	DRM-IV	DRM-V	DRM-VI	DRM-VII	DRM-VIII
	1	2	2	0	0	0	2	2
	3	3	1	0	0	0	2	8
	2	3	2	0	0	0	3	7
	5	3	2	0	0	0	2	9
	1	3	1	0	0	0	7	13
	2	7	1	0	0	0	5	10
	3	6	4	0	0	0	4	12
	5	4	1	0	0	0	3	3
	11	2	1	0	0	0	7	5
	14	3		0	0	0	5	6
	10	2		0	0	0	6	7
	18	2		0	0	0	2	5
				0	0	0	8	9
				0	0	0		10
				0	0	0		14
								2
								16
								4
								7
								9
								10
								8
M	6.25	3.33333	1.66667	0	0	0	4.30769	8
m	1.62893	0.466017	0.333333	0	0	0	0.603246	0.905012
t

## Sheet: Лист4
Tokhtar	DRM-I	DRM-II	DRM-III	DRM-IV	DRM-V	DRM-VI	DRM-VII	DRM-VIII
	6	2	1	0	0	1	5	10
	8	1	2	0	0	2	7	4
	4	3	2	0	0	2	2	2
	2	4	6	0	0	1	4	7
	2	2	4	0	0			4
	2	1	5	0	0			8
		3		0	0			6
		2		0	0			8
		1		0	0			5
		4		0	0			5
				0	0			6
				0	0			11
				0	0			2
				0	0
				0	0
	4	2.3	3.33333	0	0	1.5	4.5	6
	1.0328	0.366667	0.802773	0	0	0.288675	1.04083	0.767948

## Sheet: Лист5
Kunayev Monument	DRM-I	DRM-II	DRM-III	DRM-IV	DRM-V	DRM-VI	DRM-VII	DRM-VIII
	0	1	0	0	0	0	2	1
	0	1	0	0	0	0	2	3
	0	1	0	0	0	0	1	1
	0	1	0	0	0	0		5
	0	1	0	0	0	0
	0	1	0	0	0	0
	0	1	0	0	0	0
	0		0	0	0	0
	0		0	0	0	0
	0		0	0	0	0
	0		0	0	0	0
	0		0	0	0	0
	0		0	0	0	0
	0	1	0	0	0	0	1.66667	2.5
	0	0	0	0	0	0	0.333333	0.957427
