# Supplementary material for: High frequency direct shoot regeneration from Kazakh commercial potato cultivars
Source: PeerJ. 2020 Jul 13;8:e9447. doi: 10.7717/peerj.9447 (PMC7365135; doi:10.7717/peerj.9447)
Supplement: Supplemental Information 5 [file peerj-08-9447-s005.xlsx]

## Sheet: Лист1
Table Analyzed	Data 2
Two-way ANOVA
Source of Variation	% of total variation	P value
Interaction	12.95	< 0,0001
Time	10.01	< 0,0001
Row Factor	30.3	< 0,0001
Source of Variation	P value summary	Significant?
Interaction	****	Yes
Time	****	Yes
Row Factor	****	Yes
Source of Variation	Df	Sum-of-squares	Mean square	F
Interaction	21	391.2	18.63	6.414
Time	3	302.4	100.8	34.7
Row Factor	7	915.5	130.8	45.03
Residual	371	1078	2.905
Number of missing values	173
Bonferroni multiple comparisons	Number of comparisons: 24
Aksor vs Astanalyk
Row Factor	Aksor	Astanalyk	Difference	95% CI of diff,
DR I	6.25	2.5	-3.75	-5,719 to -1,781
DR II	3.333	1.5	-1.833	-3,990 to 0,3235
DR III	1.667	2.722	1.056	-0,7914 to 2,903
DR IV	0.1	0	-0.1	-2,184 to 1,984
DR V	0.2	0	-0.2	-2,284 to 1,884
DR VI	0.2222	0	-0.2222	-2,379 to 1,935
DR VII	4.333	2	-2.333	-4,431 to -0,2361
DR VIII	8	2.5	-5.5	-7,399 to -3,601
Row Factor	Difference	t	P value	Summary
DR I	-3.75	5.904	P < 0,0001	****
DR II	-1.833	2.635	P > 0,05	ns
DR III	1.056	1.772	P > 0,05	ns
DR IV	-0.1	0.1488	P > 0,05	ns
DR V	-0.2	0.2975	P > 0,05	ns
DR VI	-0.2222	0.3194	P > 0,05	ns
DR VII	-2.333	3.449	P < 0,05	*
DR VIII	-5.5	8.979	P < 0,0001	****
Aksor vs Tokhtar
Row Factor	Aksor	Tokhtar	Difference	95% CI of diff,
DR I	6.25	4	-2.25	-4,219 to -0,2811
DR II	3.333	2.333	-1	-3,157 to 1,157
DR III	1.667	3.333	1.667	-0,3795 to 3,713
DR IV	0.1	0	-0.1	-2,287 to 2,087
DR V	0.2	0	-0.2	-2,387 to 1,987
DR VI	0.2222	1.5	1.278	-1,052 to 3,607
DR VII	4.333	4.5	0.1667	-1,732 to 2,065
DR VIII	8	6	-2	-3,899 to -0,1013
Row Factor	Difference	t	P value	Summary
DR I	-2.25	3.543	P < 0,05	*
DR II	-1	1.437	P > 0,05	ns
DR III	1.667	2.525	P > 0,05	ns
DR IV	-0.1	0.1417	P > 0,05	ns
DR V	-0.2	0.2834	P > 0,05	ns
DR VI	1.278	1.7	P > 0,05	ns
DR VII	0.1667	0.2721	P > 0,05	ns
DR VIII	-2	3.265	P < 0,05	*
Aksor vs Kunayev Monument
Row Factor	Aksor	Kunayev Monument	Difference	95% CI of diff,
DR I	6.25	0	-6.25	-8,365 to -4,135
DR II	3.333	1	-2.333	-4,846 to 0,1793
DR III	1.667	0	-1.667	-3,980 to 0,6463
DR IV	0.1	0	-0.1	-2,606 to 2,406
DR V	0.2	0	-0.2	-2,706 to 2,306
DR VI	0.2222	0	-0.2222	-2,789 to 2,345
DR VII	4.333	1.5	-2.833	-5,806 to 0,1397
DR VIII	8	2.5	-5.5	-8,052 to -2,948
Row Factor	Difference	t	P value	Summary
DR I	-6.25	9.161	P < 0,0001	****
DR II	-2.333	2.879	P > 0,05	ns
DR III	-1.667	2.234	P > 0,05	ns
DR IV	-0.1	0.1237	P > 0,05	ns
DR V	-0.2	0.2474	P > 0,05	ns
DR VI	-0.2222	0.2683	P > 0,05	ns
DR VII	-2.833	2.954	P > 0,05	ns
DR VIII	-5.5	6.681	P < 0,0001	****
